# Supplementary material for: Vitamin D Status for Chinese Children and Adolescents in CNNHS 2016–2017
Source: MDPI journal article supplement (doi:10.3390/nu14224928), 2022-11-21
Supplement: s1 [file s1]

**Table S1.** Odds Ratio of abdominal obesity on vitamin D insufficiency and deficiency (OR, 95%CI)

| Status                  | Total                                | Boy                                   | Girl                                  |
|-------------------------|--------------------------------------|---------------------------------------|---------------------------------------|
| Vitamin D insufficiency | 1.11 (1.02–1.21)<br><i>P</i> = 0.018 | 1.11 (0.984–1.26)<br><i>P</i> = 0.088 | 1.115 (0.99–1.26)<br><i>P</i> = 0.080 |
| Vitamin D deficiency    | 1.25 (1.11–1.42)<br><i>P</i> = 0.004 | 1.32(1.09–1.60)<br><i>P</i> = 0.005   | 1.211(1.03–1.43)<br><i>P</i> = 0.021  |
